# Supplementary material for: Novel role of Engrailed 1 as a prosurvival transcription factor in basal-like breast cancer and engineering of interference peptides block its oncogenic function
Source: PubMed Central journal article supplement — Oncogene. 2013 Oct 21;33(39):4767–77. doi: 10.1038/onc.2013.422 (PMC4184217; doi:10.1038/onc.2013.422), 2013-10-21
Supplement: onc2013422x6.pdf [file onc2013422x6.pdf]

**Supplementary Table S1.** Transcription Factors containing homeoboxes differentially expressed in breast cancer subtypes.

| <b>Gene symbol</b> | <b>Gene Name</b>                             | <b>p value<sup>#</sup></b> |
|--------------------|----------------------------------------------|----------------------------|
| ADNP               | activity-dependent neuroprotector homeobox   | $p=6.51e^{-11}$            |
| ALX1               | cartilage paired-class homeoprotein 1        | $p=3.77e^{-05}$            |
| BARX1              | BarH-like homeobox 1                         | $p=0.0416$                 |
| BARX2              | BARX homeobox 2                              | $p=3.62e^{-04}$            |
| CDX2               | caudal type homeobox 2                       | $p=0.0467$                 |
| CDX4               | caudal type homeobox 4                       | $p=0.00262$                |
| CRX                | cone-rod homeobox containing gene            | $p=0.0363$                 |
| CUX1               | cut-like homeobox 1                          | $p=1.3e^{-07}$             |
| CUX2               | cut-like homeobox 2                          | $p=1.66e^{-04}$            |
| DLX3               | distal-less homeobox 3                       | $p=4.18e^{-05}$            |
| DLX4               | distal-less homeobox 4                       | $p=3.78e^{-07}$            |
| DLX5               | distal-less homeobox 5                       | $p=1.98e^{-14}$            |
| DLX6               | distal-less homeobox 6                       | $p=2.79e^{-08}$            |
| EMX2               | empty spiracles homeobox 2                   | $p=1.51e^{-04}$            |
| EN1                | engrailed homeobox 1                         | $p=4.65e^{-50}$            |
| EN2                | engrailed homeobox 2                         | $p=5.67e^{-05}$            |
| EVX1               | even-skipped homeobox 1                      | $p=7.42e^{-05}$            |
| GBX2               | gastrulation brain homeobox 2                | $p=5.24e^{-05}$            |
| GCLC               | glutamate-cysteine ligase, catalytic subunit | $p=9.33e^{-04}$            |
| GSC                | goosecoid homeobox                           | $p=5.11e^{-08}$            |
| HESX1              | HESX homeobox 1                              | $p=2.51e^{-04}$            |
| HHEX               | hematopoietically expressed homeobox         | $p=1.6e^{-11}$             |
| HLX                | H2.0-like homeobox                           | $p=1.02e^{-14}$            |
| HNF1A              | HNF1 homeobox A                              | $p=1.45e^{-04}$            |
| HOMEZ              | homeobox and leucine zipper encoding         | $p=4.53e^{-13}$            |
| HOPX               | HOP homeobox                                 | $p=1.52e^{-06}$            |
| HOXA3              | homeobox A3                                  | $p=0.0111$                 |
| HOXA4              | homeobox A4                                  | $p=1.38e^{-21}$            |
| HOXA5              | homeobox A5                                  | $p=8.04e^{-12}$            |
| HOXA7              | homeobox A7                                  | $p=4.04e^{-12}$            |
| HOXB13             | homeobox B13                                 | $p=0.00288$                |
| HOXB2              | homeobox B2                                  | $p=2.54e^{-23}$            |

|        |                                                |                        |
|--------|------------------------------------------------|------------------------|
| HOXB3  | homeobox B3                                    | p=0.0013               |
| HOXB5  | homeobox B5                                    | p=7.3e <sup>-05</sup>  |
| HOXB6  | homeobox B6                                    | p=5.4e <sup>-07</sup>  |
| HOXB8  | homeobox B8                                    | p=0.00194              |
| HOXB9  | homeobox B9                                    | p=0.00332              |
| HOXC10 | homeobox C10                                   | p=1.61e <sup>-07</sup> |
| HOXC11 | homeobox C11                                   | p=2.41 <sup>-04</sup>  |
| HOXC13 | homeobox C13                                   | p=4.3e <sup>-11</sup>  |
| HOXC8  | homeobox C8                                    | p=0.00291              |
| HOXC9  | homeobox C9                                    | p=1.61e <sup>-07</sup> |
| HOXD1  | homeobox D1                                    | p=0.00637              |
| HOXD13 | homeobox D13                                   | p=0.0229               |
| HOXD3  | homeobox D3                                    | p=0.027                |
| HOXD8  | homeobox D8                                    | p=3.97e <sup>-09</sup> |
| HOXD9  | homeobox D9                                    | p=1.66 <sup>-04</sup>  |
| IRX1   | iroquois homeobox 1                            | p=1.15e <sup>-11</sup> |
| IRX2   | iroquois homeobox 2                            | p=3.7e <sup>-07</sup>  |
| IRX3   | iroquois homeobox 3                            | p=8.97e <sup>-18</sup> |
| IRX4   | iroquois homeobox 4                            | p=1.63e <sup>-05</sup> |
| IRX5   | iroquois homeobox 5                            | p=1.28e <sup>-15</sup> |
| IRX6   | iroquois homeobox 6                            | p=0.0434               |
| LASS2  | LAG1 homolog, ceramide synthase 2              | p=1.25e <sup>-23</sup> |
| LASS4  | LAG1 homolog, ceramide synthase 4              | p=3.14e <sup>-15</sup> |
| LBX1   | LIM homeobox 1                                 | p=0.00544              |
| LHX1   | LIM homeobox 1                                 | p=0.00542              |
| LHX2   | LIM homeobox 2                                 | p=4.65e <sup>-08</sup> |
| LHX6   | LIM homeobox 6                                 | p=6.08e <sup>-10</sup> |
| LMX1A  | LIM homeobox transcription factor 1, alpha     | p=0.0216               |
| MEIS1  | Meis homeobox 1                                | p=0.0129               |
| MEIS2  | Meis homeobox 2                                | p=5.43e <sup>-11</sup> |
| MEIS3  | Meis homeobox 3; Meis homeobox 3 pseudogene 2  | p=3.41e <sup>-04</sup> |
| MEOX1  | mesenchyme homeobox 1                          | p=1.39e <sup>-09</sup> |
| MEOX2  | mesenchyme homeobox 2                          | p=5.18e <sup>-09</sup> |
| MIXL1  | Mix1 homeobox-like 1 ( <i>Xenopus laevis</i> ) | p=0.0368               |
| MNX1   | motor neuron and pancreas homeobox 1           | p=0.1                  |
| MSX2   | msh homeobox 2                                 | p=2.04e <sup>-09</sup> |
| NANOG  | Nanog homeobox pseudogene 8; Nanog             | p=0.0055               |

|         |                                             |                        |
|---------|---------------------------------------------|------------------------|
|         | homeobox                                    |                        |
| NKX2.3  | NK2 homeobox 3                              | p=0.00476              |
| NKX2.5  | NK2 homeobox 5                              | p=5.94e <sup>-09</sup> |
| NKX3.1  | NK3 homeobox 1                              | p=0.00374              |
| NKX6.1  | NK6 homeobox 1                              | p=0.0353               |
| ONECUT2 | one cut homeobox 2                          | p=9.76e <sup>-05</sup> |
| OTP     | orthopedia homeobox                         | p=0.00464              |
| OTX1    | orthodenticle homeobox 1                    | p=7.85e <sup>-05</sup> |
| OTX2    | orthodenticle homeobox 2                    | p=0.0561               |
| PBX1    | pre-B-cell leukemia homeobox 1              | p=6.32e <sup>-20</sup> |
| PBX3    | pre-B-cell leukemia homeobox 3              | p=4.42e <sup>-07</sup> |
| PBX4    | pre-B-cell leukemia homeobox 4              | p=3.39e <sup>-13</sup> |
| PHOX2A  | paired-like homeobox 2a                     | p=3.62e <sup>-3</sup>  |
| PHOX2B  | paired-like homeobox 2b                     | p=1.56e <sup>-04</sup> |
| PHTF1   | putative homeodomain transcription factor 1 | p=1.18e <sup>-08</sup> |
| PITX1   | paired-like homeodomain 1                   | p=1.06 <sup>-04</sup>  |
| PITX3   | paired-like homeodomain 3                   | p=3.18e <sup>-06</sup> |
| PKNOX2  | Pbx/knotted 1 homeobox 2                    | p=0.0233               |
| POU2F1  | POU class 2 homeobox 1                      | p=0.00603              |
| POU2F2  | POU class 2 homeobox 2                      | p=2.02e <sup>-07</sup> |
| POU3F2  | POU class 3 homeobox 2                      | p=3.53e <sup>-06</sup> |
| POU3F4  | POU class 3 homeobox 4                      | p=7.78e <sup>-04</sup> |
| POU4F1  | POU class 4 homeobox 1                      | p=2.19e <sup>-09</sup> |
| POU5F1  | POU class 5 homeobox 1                      | p=9.64e <sup>-12</sup> |
| PROP1   | PROP paired-like homeobox 1                 | p=5.42e <sup>-16</sup> |
| PROX1   | prospero homeobox 1                         | 1.73e <sup>-08</sup>   |
| PRRX1   | paired related homeobox 1                   | p=1.12e <sup>-06</sup> |
| PRRX2   | paired related homeobox 2                   | p=0.00114              |
| RAX     | retina and anterior neural fold homeobox    | p=0.00368              |
| RHOXF1  | Rhox homeobox family, member 1              | p=6.03e <sup>-09</sup> |
| SATB1   | SATB homeobox 1                             | p=4.79e <sup>-10</sup> |
| SHOX    | short stature homeobox                      | p=0.00296              |
| SHOX2   | short stature homeobox 2                    | p=7.17e <sup>-09</sup> |
| SIX1    | SIX homeobox 1                              | p=9.78e <sup>-07</sup> |
| SIX3    | SIX homeobox 3                              | p=2.5e <sup>-05</sup>  |
| SIX4    | SIX homeobox 4                              | p=7.88e <sup>-05</sup> |
| SIX6    | SIX homeobox 6                              | p=.66e <sup>-04</sup>  |

|       |                                                 |                 |
|-------|-------------------------------------------------|-----------------|
| TGIF1 | TGFB-induced factor homeobox 1                  | $p=4.47e^{-08}$ |
| TGIF2 | TGFB-induced factor homeobox 2                  | $p=8.61e^{-05}$ |
| TLX1  | T-cell leukemia homeobox 1                      | $p=2.55e^{-05}$ |
| TSHZ1 | teashirt zinc finger homeobox 1                 | $p=2.38e^{-16}$ |
| VENTX | VENT homeobox homolog ( <i>Xenopus laevis</i> ) | $p=4.82e^{-10}$ |
| VSX1  | visual system homeobox 1                        | $p=8.81e^{-26}$ |
| ZFH2  | zinc finger homeobox 2                          | $p=1.36e^{-05}$ |
| ZHX1  | zinc fingers and homeoboxes 1                   | $p=2.59e^{-05}$ |
| ZHX3  | zinc fingers and homeoboxes 3                   | $p=0.00664$     |

# P < 0.05 Probability of expression in any breast cancer subtype.
