# Supplementary material for: Novel role of Engrailed 1 as a prosurvival transcription factor in basal-like breast cancer and engineering of interference peptides block its oncogenic function
Source: PubMed Central journal article supplement — Oncogene. 2013 Oct 21;33(39):4767–77. doi: 10.1038/onc.2013.422 (PMC4184217; doi:10.1038/onc.2013.422), 2013-10-21
Supplement: onc2013422x7.pdf [file onc2013422x7.pdf]

Supplementary Table S2. Differentially regulated genes in SUM149PT overexpressing EN1.

| <b>GENES UP-REGULATED</b> |                    |                    |                                                                            |
|---------------------------|--------------------|--------------------|----------------------------------------------------------------------------|
| <b>GENE ID</b>            | <b>GENE SYMBOL</b> | <b>FOLD CHANGE</b> | <b>GENE NAME</b>                                                           |
| 2570                      | GABRR2             | 6.2985             | gamma-aminobutyric acid (GABA) receptor, rho 2                             |
| 6373                      | CXCL11             | 5.3025             | chemokine (C-X-C motif) ligand 11                                          |
| 11082                     | ESM1               | 5.2902             | endothelial cell-specific molecule 1                                       |
| 1437                      | CSF2               | 5.1778             | colony stimulating factor 2 (granulocyte-macrophage)                       |
| 84674                     | CARD6              | 5.1515             | caspase recruitment domain family, member 6                                |
| 5473                      | PPBP               | 4.8810             | pro-platelet basic protein (chemokine (C-X-C motif) ligand 7)              |
| 969                       | CD69               | 4.8182             | CD69 molecule                                                              |
| 140690                    | CTCFL              | 3.9577             | CCCTC-binding factor (zinc finger protein)-like                            |
| 5328                      | PLAU               | 3.9267             | plasminogen activator, urokinase                                           |
| 26053                     | AUTS2              | 3.7451             | autism susceptibility candidate 2                                          |
| 29785                     | CYP2S1             | 3.7201             | cytochrome P450, family 2, subfamily S, polypeptide 1                      |
| 51561                     | IL23A              | 3.5431             | interleukin 23, alpha subunit p19                                          |
| 4907                      | NT5E               | 3.5105             | 5'-nucleotidase, ecto (CD73)                                               |
| 3170                      | FOXA2              | 3.4862             | forkhead box A2                                                            |
| 3885                      | KRT34              | 3.4172             | keratin 34                                                                 |
| 3037                      | HAS2               | 3.3519             | hyaluronan synthase 2                                                      |
| 151254                    | ALS2CR11           | 3.3273             | amyotrophic lateral sclerosis 2 (juvenile) chromosome region, candidate 11 |
| 3641                      | INSL4              | 3.3211             | insulin-like 4 (placenta)                                                  |
| 6447                      | SCG5               | 3.2868             | secretogranin V (7B2 protein)                                              |
| 79589                     | RNF128             | 3.2577             | ring finger protein 128                                                    |
| 118429                    | ANTXR2             | 3.1932             | anthrax toxin receptor 2                                                   |
| 53836                     | GPR87              | 3.1492             | G protein-coupled receptor 87                                              |
| 54627                     | KIAA1383           | 3.1449             | KIAA1383                                                                   |
| 7850                      | IL1R2              | 3.1347             | interleukin 1 receptor, type II                                            |
| 6372                      | CXCL6              | 3.0234             | chemokine (C-X-C motif) ligand 6 (granulocyte chemotactic protein 2)       |
| 1009                      | CDH11              | 2.9554             | cadherin 11, type 2, OB-cadherin (osteoblast)                              |
| 84419                     | C15orf48           | 2.9349             | chromosome 15 open reading frame 48                                        |
| 5744                      | PTH1H              | 2.9316             | parathyroid hormone-like hormone                                           |
| 50486                     | G0S2               | 2.9201             | G0/G1switch 2                                                              |
| 81029                     | WNT5B              | 2.8879             | wingless-type MMTV integration site family, member 5B                      |
| 57214                     | KIAA1199           | 2.8845             | KIAA1199                                                                   |
| 3589                      | IL11               | 2.8745             | interleukin 11                                                             |
| 4674                      | NAP1L2             | 2.8603             | nucleosome assembly protein 1-like 2                                       |
| 55107                     | ANO1               | 2.8547             | anoctamin 1, calcium activated chloride channel                            |
| 149111                    | CNIH3              | 2.8448             | cornichon homolog 3 (Drosophila)                                           |
| 114801                    | TMEM200A           | 2.8076             | transmembrane protein 200A                                                 |

|        |          |        |                                                                         |
|--------|----------|--------|-------------------------------------------------------------------------|
| 1305   | COL13A1  | 2.7352 | collagen, type XIII, alpha 1                                            |
| 29126  | CD274    | 2.7201 | CD274 molecule                                                          |
| 6567   | SLC16A2  | 2.7038 | solute carrier family 16, member 2 (monocarboxylic acid transporter 8)  |
| 3576   | IL8      | 2.6882 | interleukin 8                                                           |
| 53831  | GPR84    | 2.6858 | G protein-coupled receptor 84                                           |
| 4688   | NCF2     | 2.6721 | neutrophil cytosolic factor 2                                           |
| 139411 | PTCHD1   | 2.6565 | patched domain containing 1                                             |
| 64648  | SPANXD   | 2.6329 | SPANX family, member E; SPANX family, member D                          |
| 11174  | ADAMTS6  | 2.6027 | ADAM metalloproteinase with thrombospondin type 1 motif, 6              |
| 4153   | MBL2     | 2.5767 | mannose-binding lectin (protein C) 2, soluble (opsonic defect)          |
| 151258 | SLC38A11 | 2.5524 | solute carrier family 38, member 11                                     |
| 6351   | CCL4     | 2.5140 | chemokine (C-C motif) ligand 4                                          |
| 84189  | SLITRK6  | 2.5053 | SLIT and NTRK-like family, member 6                                     |
| 8862   | APLN     | 2.4967 | apelin                                                                  |
| 5055   | SERPINB2 | 2.4938 | serpin peptidase inhibitor, clade B (ovalbumin), member 2               |
| 57829  | ZP4      | 2.4880 | zona pellucida glycoprotein 4                                           |
| 80215  | C21orf96 | 2.4817 | chromosome 21 open reading frame 96                                     |
| 3157   | HMGCS1   | 2.4794 | 3-hydroxy-3-methylglutaryl-Coenzyme A synthase 1 (soluble)              |
| 203859 | ANO5     | 2.4774 | anoctamin 5                                                             |
| 57458  | TMCC3    | 2.4594 | transmembrane and coiled-coil domain family 3                           |
| 51066  | C3orf32  | 2.4509 | chromosome 3 open reading frame 32                                      |
| 64663  | SPANXC   | 2.4504 | SPANX family, member C                                                  |
| 3689   | ITGB2    | 2.4116 | integrin, beta 2 (complement component 3 receptor 3 and 4 subunit)      |
| 27147  | DENND2A  | 2.3977 | DENN/MADD domain containing 2A                                          |
| 558    | AXL      | 2.3894 | AXL receptor tyrosine kinase                                            |
| 64232  | MS4A5    | 2.3743 | membrane-spanning 4-domains, subfamily A, member 5                      |
| 185    | AGTR1    | 2.3620 | angiotensin II receptor, type 1                                         |
| 639    | PRDM1    | 2.3620 | PR domain containing 1, with ZNF domain                                 |
| 54796  | BNC2     | 2.3349 | basonuclin 2                                                            |
| 3294   | HSD17B2  | 2.3107 | hydroxysteroid (17-beta) dehydrogenase 2                                |
| 5999   | RGS4     | 2.2947 | regulator of G-protein signaling 4                                      |
| 22822  | PHLDA1   | 2.2815 | pleckstrin homology-like domain, family A, member 1                     |
| 256979 | SUNC1    | 2.2799 | Sad1 and UNC84 domain containing 1                                      |
| 1026   | CDKN1A   | 2.2789 | cyclin-dependent kinase inhibitor 1A (p21, Cip1)                        |
| 9915   | ARNT2    | 2.2579 | aryl-hydrocarbon receptor nuclear translocator 2                        |
| 26585  | GREM1    | 2.2527 | gremlin 1, cysteine knot superfamily, homolog ( <i>Xenopus laevis</i> ) |
| 9173   | IL1RL1   | 2.2475 | interleukin 1 receptor-like 1                                           |
| 3932   | LCK      | 2.2460 | lymphocyte-specific protein tyrosine kinase                             |
| 64407  | RGS18    | 2.2405 | regulator of G-protein signaling 18                                     |
| 283316 | CD163L1  | 2.2243 | CD163 molecule-like 1                                                   |
| 1308   | COL17A1  | 2.2243 | collagen, type XVII, alpha 1                                            |

|        |          |        |                                                                                   |
|--------|----------|--------|-----------------------------------------------------------------------------------|
| 344558 | SH3RF3   | 2.2232 | SH3 domain containing ring finger 3                                               |
| 4314   | MMP3     | 2.2199 | matrix metalloproteinase 3 (stromelysin 1, progelatinase)                         |
| 84364  | ARFGAP2  | 2.2076 | ADP-ribosylation factor GTPase activating protein 2                               |
| 7122   | CLDN5    | 2.2038 | claudin 5                                                                         |
| 144406 | WDR66    | 2.1987 | WD repeat domain 66                                                               |
| 3936   | LCP1     | 2.1987 | lymphocyte cytosolic protein 1 (L-plastin)                                        |
| 23209  | MLC1     | 2.1873 | megalencephalic leukoencephalopathy with subcortical cysts 1                      |
| 220    | ALDH1A3  | 2.1785 | aldehyde dehydrogenase 1 family, member A3                                        |
| 56131  | PCDHB4   | 2.1772 | protocadherin beta 4                                                              |
| 7422   | VEGFA    | 2.1660 | vascular endothelial growth factor A                                              |
| 7462   | LAT2     | 2.1610 | linker for activation of T cells family, member 2                                 |
| 6751   | SSTR1    | 2.1550 | somatostatin receptor 1                                                           |
| 57580  | PREX1    | 2.1497 | phosphatidylinositol-3,4,5-trisphosphate-dependent Rac exchange factor 1          |
| 7429   | VIL1     | 2.1460 | villin 1                                                                          |
| 157310 | PEBP4    | 2.1455 | phosphatidylethanolamine-binding protein 4                                        |
| 29881  | NPC1L1   | 2.1411 | NPC1 (Niemann-Pick disease, type C1, gene)-like 1                                 |
| 11009  | IL24     | 2.1356 | interleukin 24                                                                    |
| 23743  | BHMT2    | 2.1214 | betaine-homocysteine methyltransferase 2                                          |
| 272    | AMPD3    | 2.1165 | adenosine monophosphate deaminase (isoform E)                                     |
| 8876   | VNN1     | 2.1116 | vanin 1                                                                           |
| 284467 | FAM19A3  | 2.1116 | family with sequence similarity 19 (chemokine (C-C motif)-like), member A3        |
| 256691 | MAMDC2   | 2.1094 | MAM domain containing 2                                                           |
| 1960   | EGR3     | 2.0888 | early growth response 3                                                           |
| 10242  | KCNMB2   | 2.0869 | potassium large conductance calcium-activated channel, subfamily M, beta member 2 |
| 93953  | ACRC     | 2.0818 | acidic repeat containing                                                          |
| 27071  | DAPP1    | 2.0753 | dual adaptor of phosphotyrosine and 3-phosphoinositides                           |
| 5053   | PAH      | 2.0724 | phenylalanine hydroxylase                                                         |
| 256076 | COL29A1  | 2.0722 | collagen, type XXIX, alpha 1                                                      |
| 84953  | MICALCL  | 2.0610 | MICAL C-terminal like                                                             |
| 2335   | FN1      | 2.0562 | fibronectin 1                                                                     |
| 9582   | APOBEC3B | 2.0491 | apolipoprotein B mRNA editing enzyme, catalytic polypeptide-like 3B               |
| 23090  | ZNF423   | 2.0477 | zinc finger protein 423                                                           |
| 164668 | APOBEC3H | 2.0477 | apolipoprotein B mRNA editing enzyme, catalytic polypeptide-like 3H               |
| 6580   | SLC22A1  | 2.0430 | solute carrier family 22 (organic cation transporter), member 1                   |
| 56953  | NT5M     | 2.0359 | 5',3'-nucleotidase, mitochondrial                                                 |
| 80380  | PDCD1LG2 | 2.0350 | programmed cell death 1 ligand 2                                                  |
| 881    | CCIN     | 2.0296 | calicin                                                                           |
| 374918 | IGFL1    | 2.0246 | IGF-like family member 1                                                          |
| 8647   | ABCB11   | 2.0228 | ATP-binding cassette, sub-family B (MDR/TAP), member 11                           |

| 2828                        | GPR4               | 2.0162             | G protein-coupled receptor 4                                                          |
|-----------------------------|--------------------|--------------------|---------------------------------------------------------------------------------------|
| 122786                      | FRMD6              | 2.0139             | FERM domain containing 6                                                              |
| 200150                      | PLD5               | 2.0104             | phospholipase D family, member 5                                                      |
| 1901                        | S1PR1              | 2.0093             | sphingosine-1-phosphate receptor 1                                                    |
| 90576                       | ZNF799             | 2.0056             | zinc finger protein 799                                                               |
| 91120                       | ZNF682             | 2.0046             | zinc finger protein 682                                                               |
| <b>GENES DOWN REGULATED</b> |                    |                    |                                                                                       |
| <b>GENE ID</b>              | <b>GENE SYMBOL</b> | <b>FOLD CHANGE</b> | <b>GENE NAME</b>                                                                      |
| 51438                       | MAGEC2             | 0.1109             | melanoma antigen family C, 2                                                          |
| 4948                        | OCA2               | 0.2298             | oculocutaneous albinism II                                                            |
| 26223                       | FBXL21             | 0.2321             | F-box and leucine-rich repeat protein 21                                              |
| 143662                      | MUC15              | 0.2393             | mucin 15, cell surface associated                                                     |
| 5179                        | PENK               | 0.2576             | proenkephalin                                                                         |
| 8424                        | BBOX1              | 0.2719             | butyrobetaine (gamma), 2-oxoglutarate dioxygenase (gamma-butyrobetaine hydroxylase) 1 |
| 64881                       | PCDH20             | 0.2835             | protocadherin 20                                                                      |
| 9627                        | SNCAIP             | 0.2914             | synuclein, alpha interacting protein                                                  |
| 1580                        | CYP4B1             | 0.2946             | cytochrome P450, family 4, subfamily B, polypeptide 1                                 |
| 22914                       | KLRK1              | 0.2951             | killer cell lectin-like receptor subfamily K, member 1                                |

# Genes listed are those with a more than 2-fold change either up- or down-regulated.
