# Supplementary figures and images for: Novel role of Engrailed 1 as a prosurvival transcription factor in basal-like breast cancer and engineering of interference peptides block its oncogenic function
Source: PubMed Central journal article supplement — Oncogene. 2013 Oct 21;33(39):4767–77. doi: 10.1038/onc.2013.422 (PMC4184217; doi:10.1038/onc.2013.422), 2013-10-21

# Supplementary Figure S1

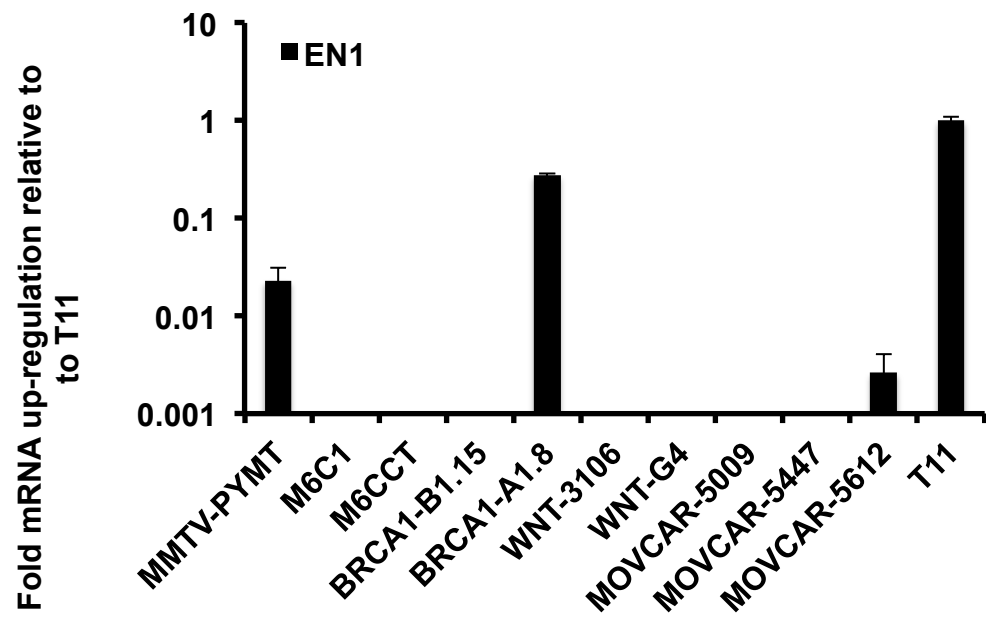

Supplement: onc2013422x1.pdf [file onc2013422x1.pdf]

Supplementary Figure S2

## MDA-MB-231

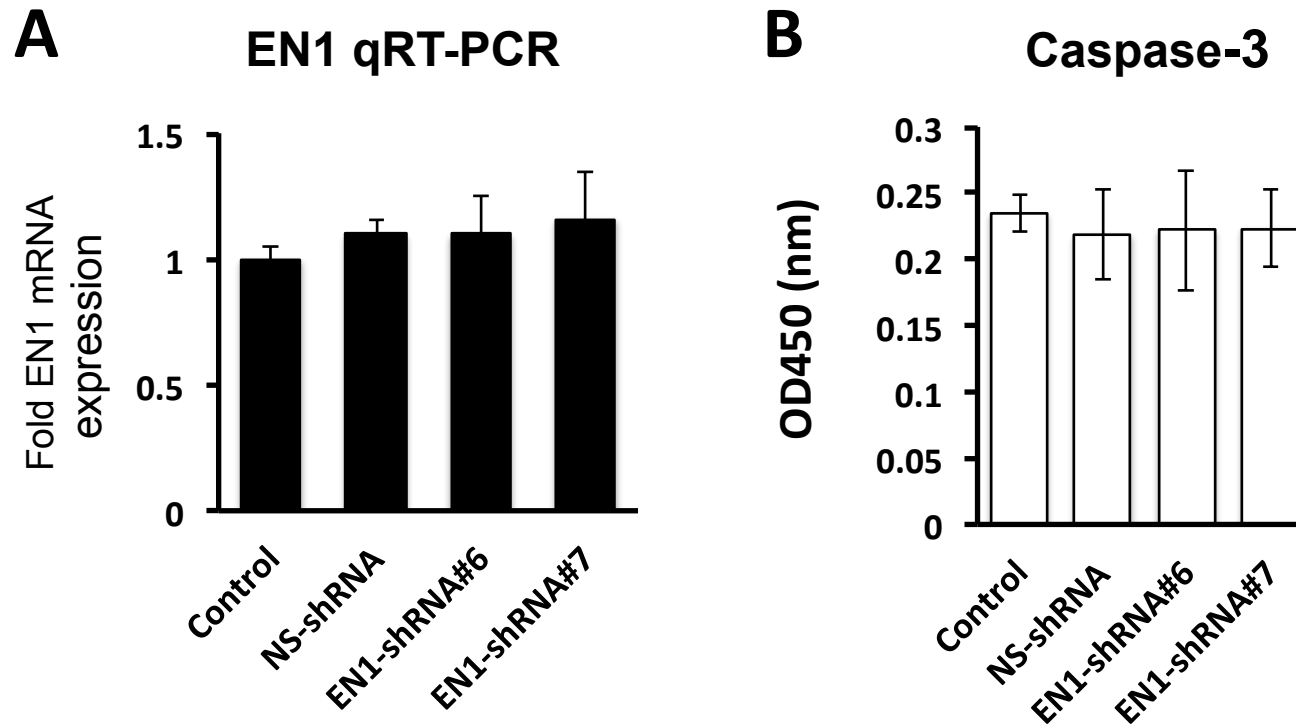

Supplement: onc2013422x2.pdf [file onc2013422x2.pdf]

Supplementary Figure S3

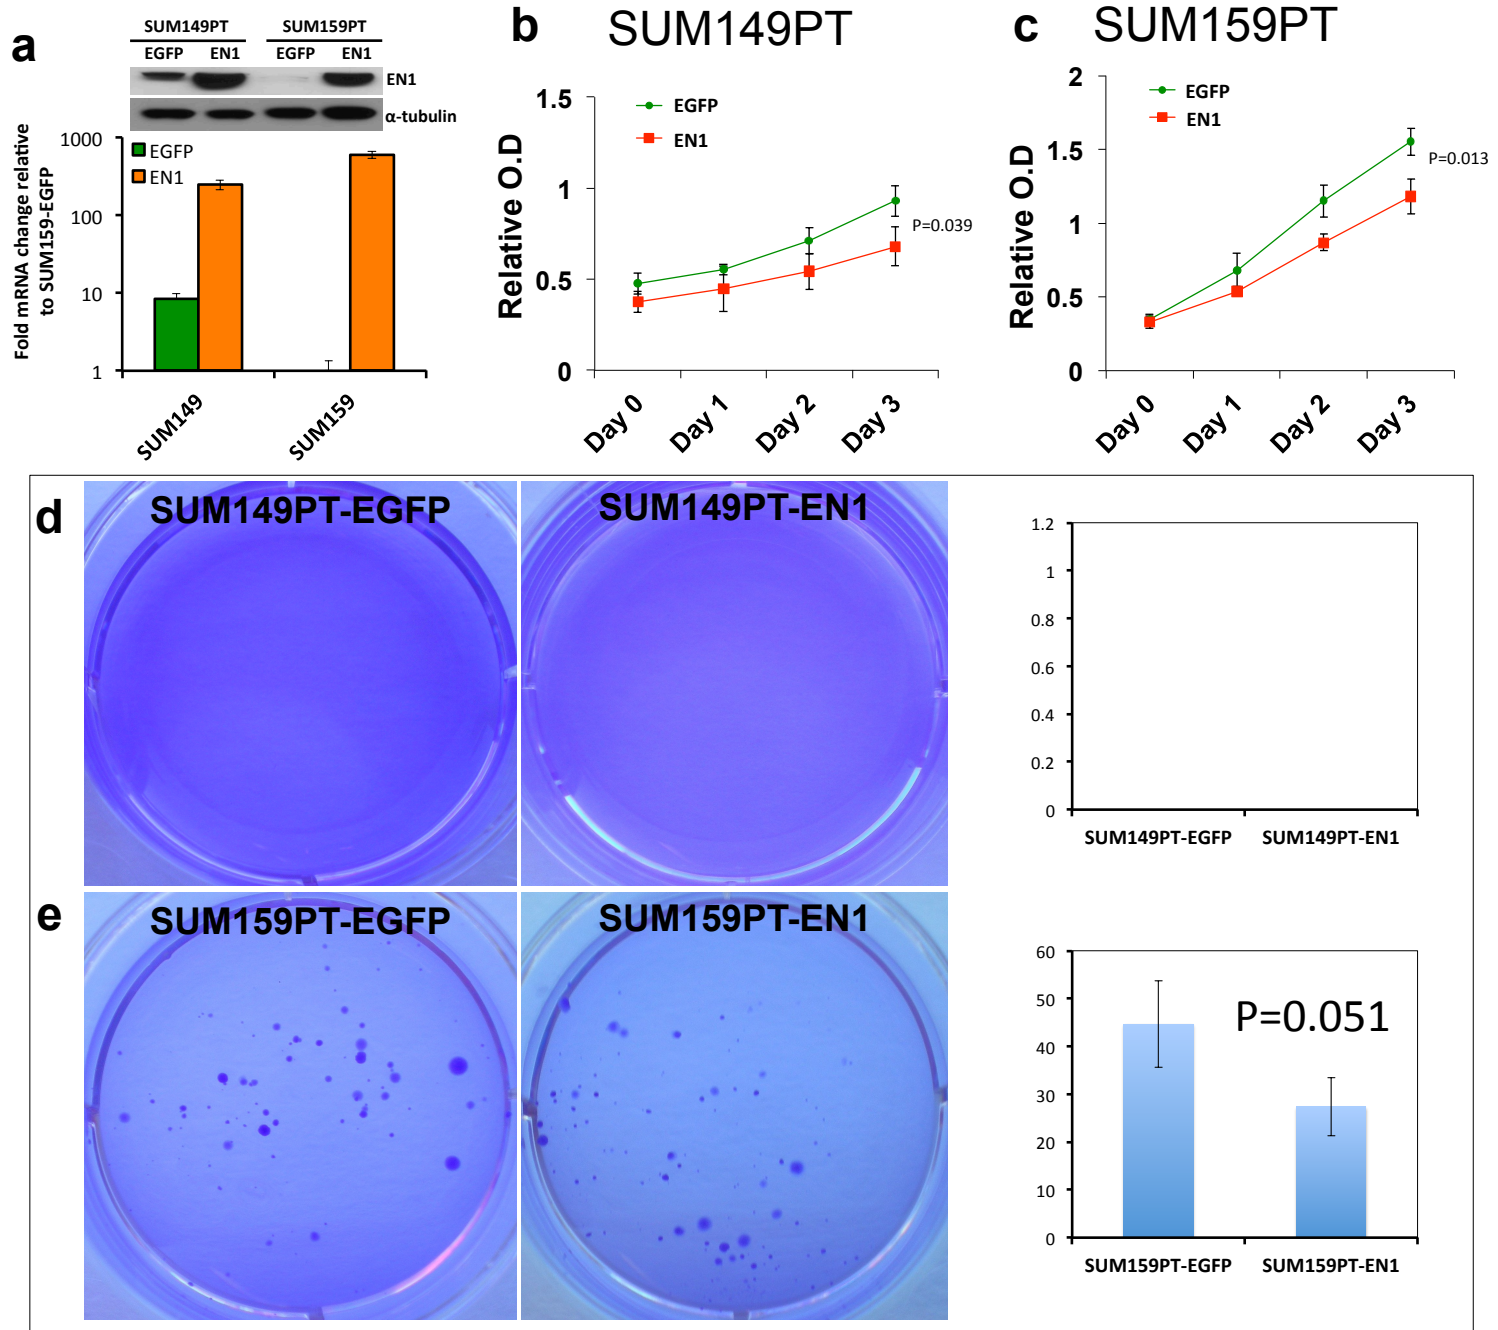

Supplement: onc2013422x3.pdf [file onc2013422x3.pdf]

Supplementary Figure S4

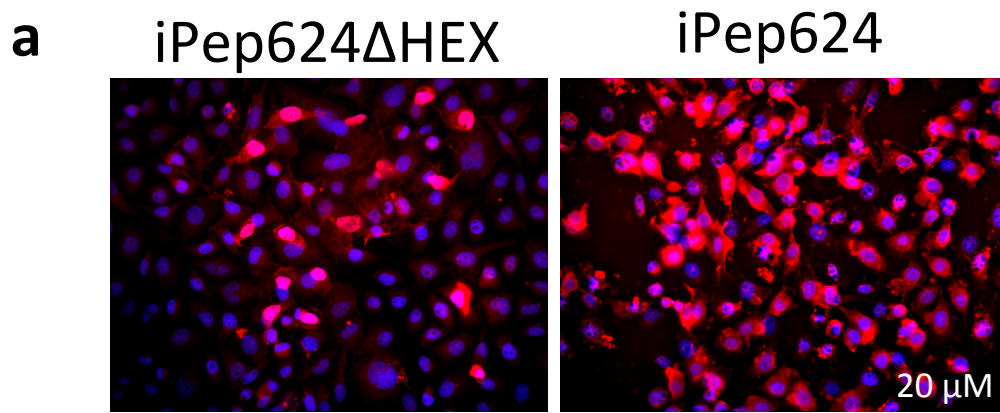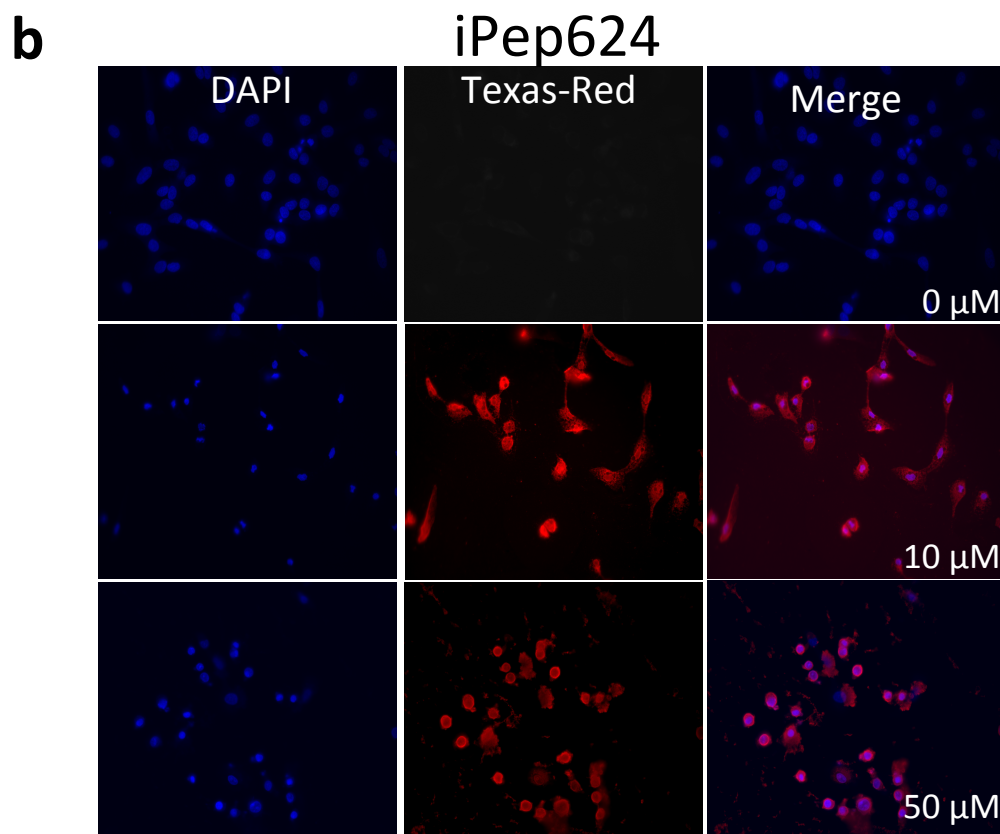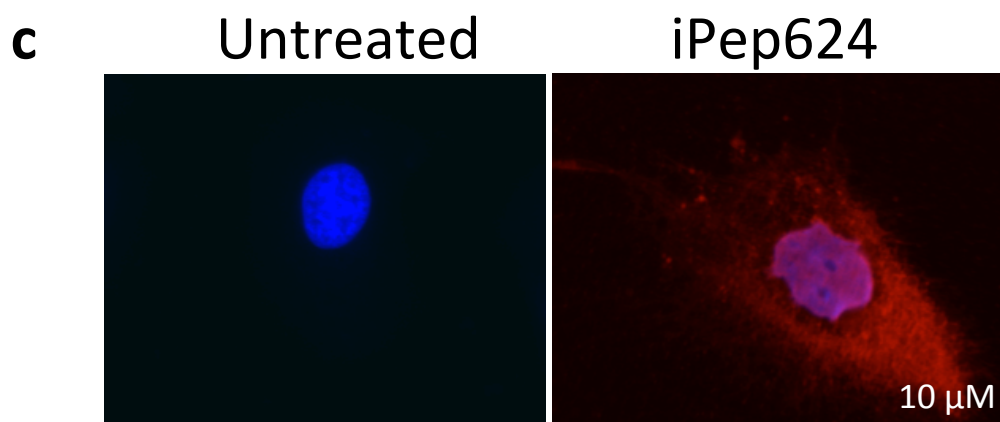

Supplement: onc2013422x4.pdf [file onc2013422x4.pdf]

# Supplementary Figure S5

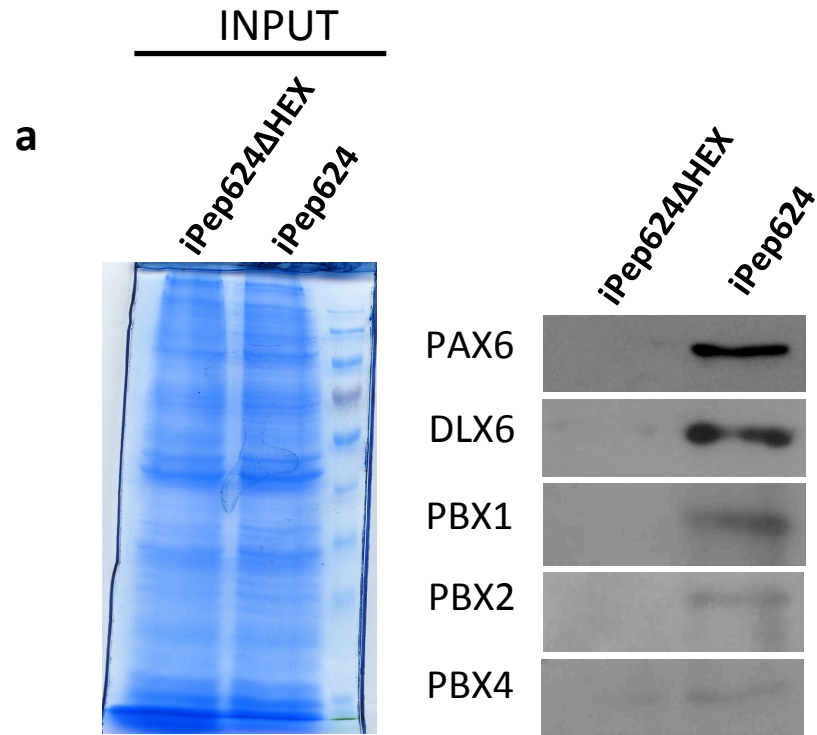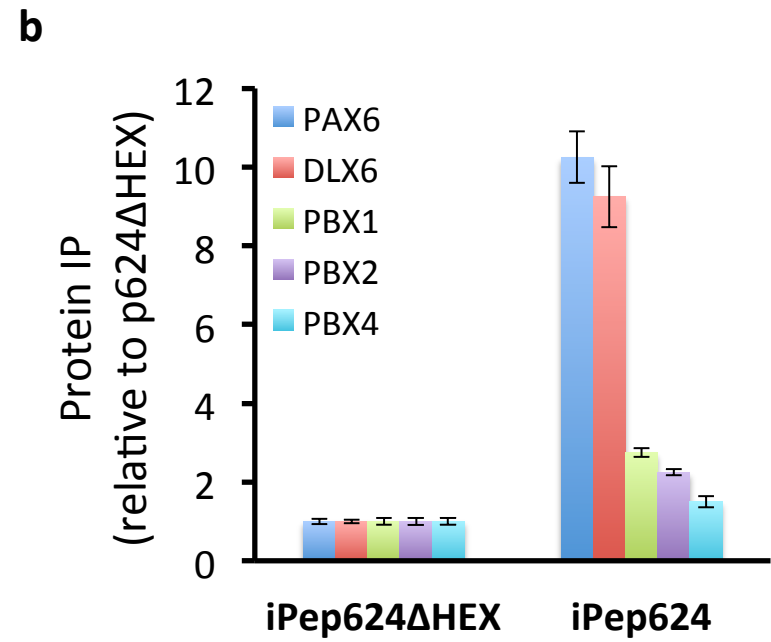

Supplement: onc2013422x5.pdf [file onc2013422x5.pdf]
